# Supplementary material for: SNOWstorm (v1.0) – a deep-learning based model for near-surface winds and drifting snow in mountain environments
Source: Copernicus journal article supplement (doi:10.5194/egusphere-2025-5608), 2026-01-16
Supplement: Supplementary file 1 [file egusphere-2025-5608-supplement.pdf]

# Supplementary Material to SNOWstorm - a deep-learning based model for near-surface winds and drifting snow in mountain environments

Manuel Saigger, Brigitta Goger, Thomas Mölg

Table S1: Hyperparameters for individual U-Nets for near-surface winds (NSW), snow mass change rate (DSM), vertically integrated sublimation rate (SUBL\_VI) and vertically integrated snow transport rate (SNOW\_VI)

|                         | NSW        | DSM        | SUBL_VI    | SNOW_VI    |
|-------------------------|------------|------------|------------|------------|
| loss function           | MSE        | MSE        | MSE        | MAE        |
| batch size              | 4          | 12         | 12         | 12         |
| initial learning rate   | 0.01       | 0.001      | 0.001      | 0.01       |
| learning rate reduction | True       | True       | True       | True       |
| weight initialization   | Xavier uni | Xavier uni | Xavier uni | Xavier uni |
| optimizer               | SGD        | SGD        | SGD        | SGD        |

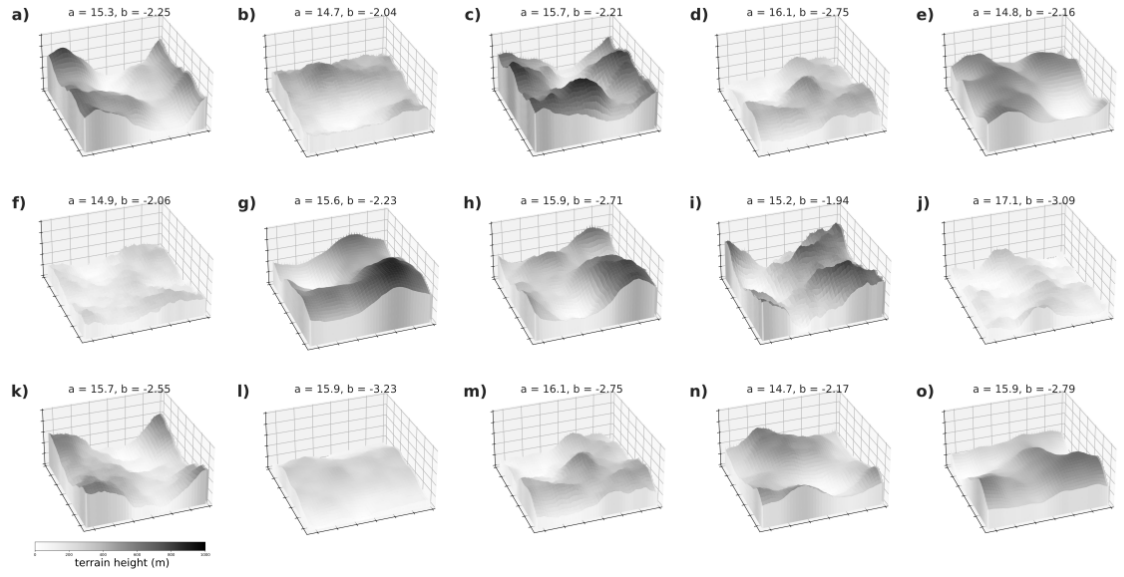

Figure S1: Examples for synthetic topographies with different spectral slope settings  $a$  and  $b$  (see Eq. 1).

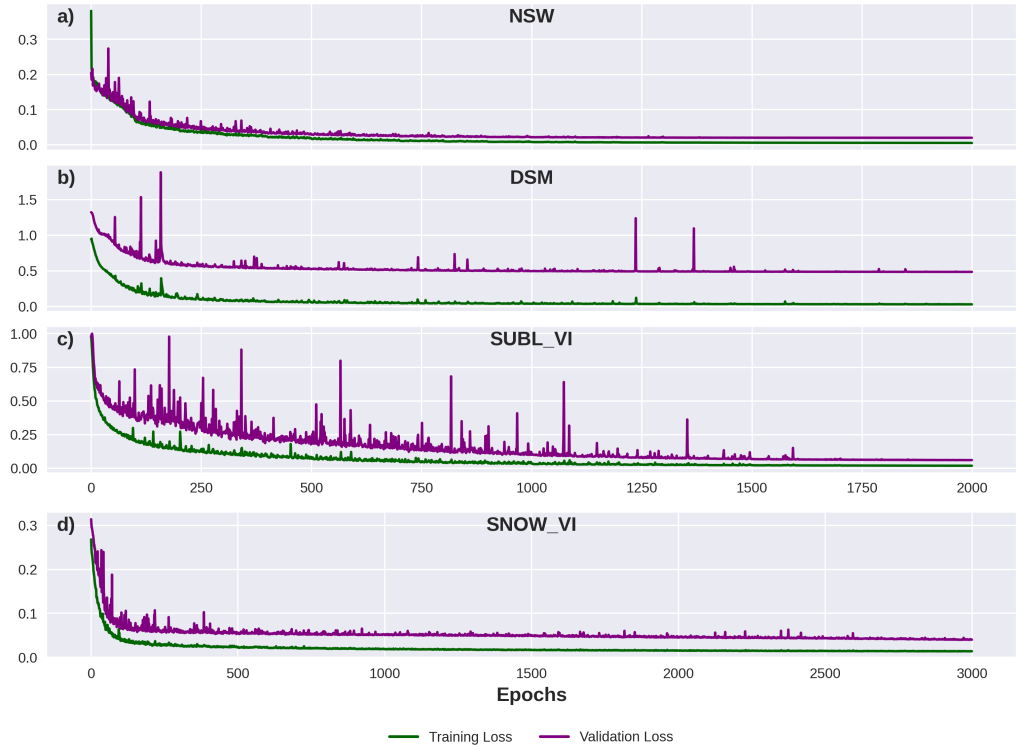

Figure S2: Loss curves for the training of individual U-Nets for near-surface winds (NSW, a), snow mass change rate (DSM, b), vertically integrated sublimation rate (SUBL\_VI, c) and vertically integrated snow transport rate (SNOW\_VI, d)

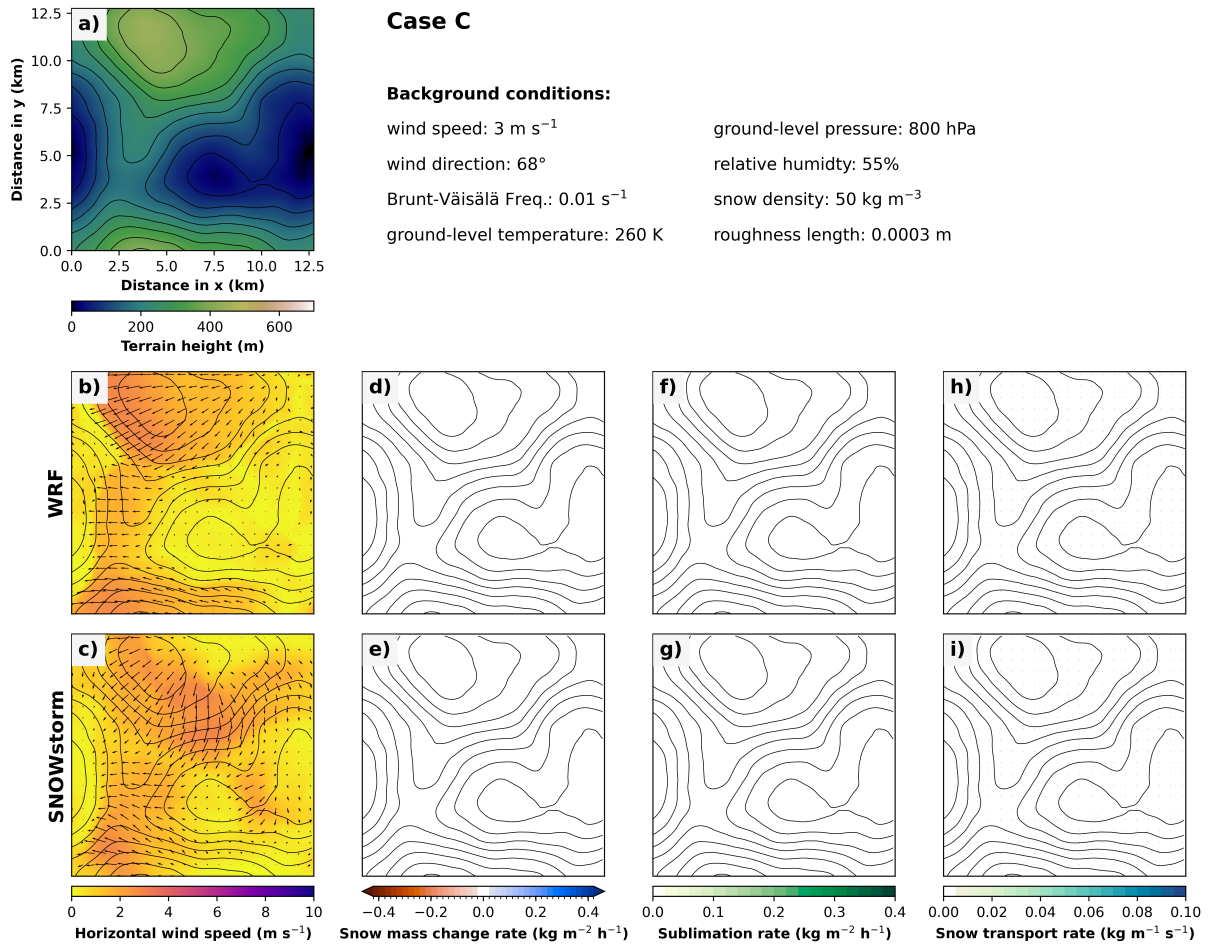

Figure S3: Similar to Fig. 5, but for case C.

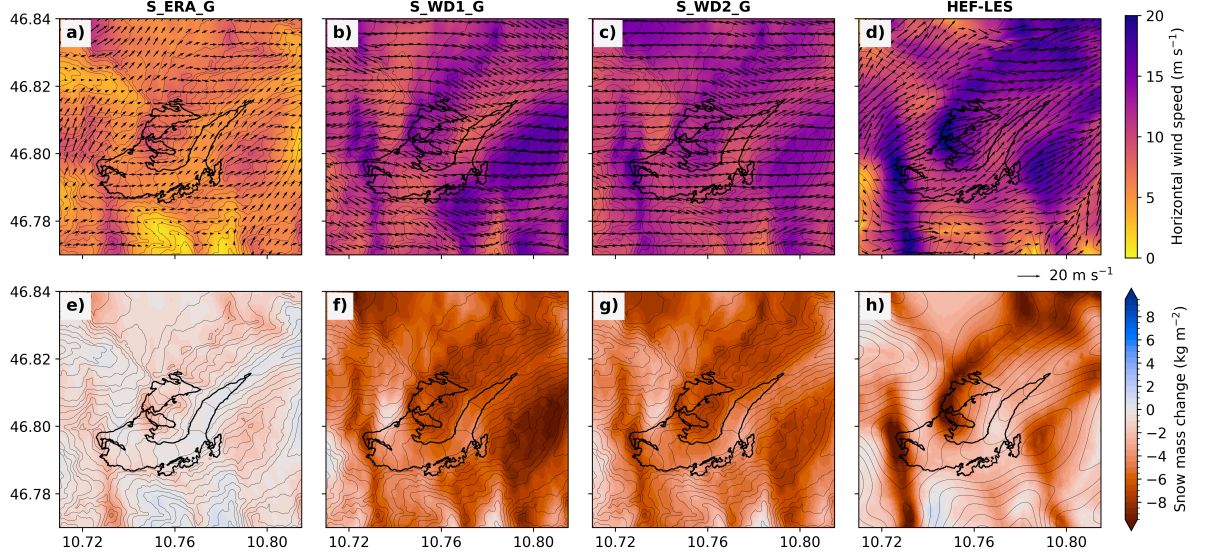

Figure S4: Similar to Fig. 9, but with SNOWstorm driven on GLO-30 topography

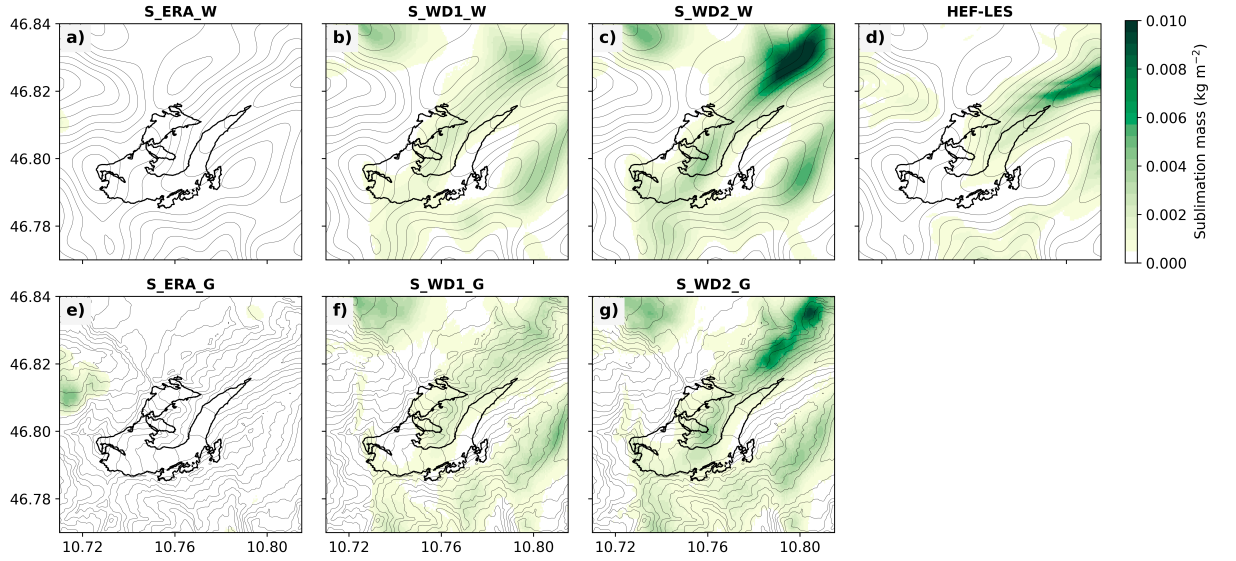

Figure S5: Drifting snow sublimation accumulated for 08 February 2021 predicted by SNOWstorm (a–c, e–g) for experiments with various input data sets and HEF-LES (d). SNOWstorm predictions use HEF-LES topography in a–c and GLO-30 topography in e–g. Model topography and glacier outlines are similar to Fig. 9
